# Supplementary material for: Integrative genomic and transcriptomic analysis of genetic markers in Dupuytren’s disease
Source: BMC Med Genomics. 2019 Jul 11;12(Suppl 5):98. doi: 10.1186/s12920-019-0518-3 (PMC6624179; doi:10.1186/s12920-019-0518-3)
Supplement: Supplementary file 4 — The results of functional enrichment analysis in Fig. 2d. (XLS 38 kb) [file 12920_2019_518_MOESM4_ESM.xls]

## Sheet: Sheet1
Additional file 4. The results of functional enrichment analysis in Fig. 2D.
Category	Term	Genes	PValue	FDR
Gene Ontology	GO:0030198 extracellular matrix organization	ACAN, BGN, COL1A1, COL1A2, COL3A1, COL5A1, COL5A2, COL6A1, COL6A2, COL6A3, COL7A1, COL8A1, COL8A2, COL16A1, ELN, TNC, ITGA5, ITGAV, ITGB1, ITGB5, LAMA2, LAMC1, LOX, SERPINE1, SPARC, TGFBI, COL14A1, PXDN, ITGA10, PRDX4, POSTN, ITGA11, OLFML2B, SMOC2, COL18A1, CRISPLD2	2.10082e-13	3.75988e-10
Gene Ontology	GO:0030574 collagen catabolic process	COL1A1, COL1A2, COL3A1, COL5A1, COL5A2, COL6A1, COL6A2, COL6A3, COL7A1, COL8A1, COL8A2, COL12A1, CTSB, CTSK, MMP2, MMP11, COL18A1	4.87065e-09	8.7183e-06
Gene Ontology	GO:0006888 ER to Golgi vesicle-mediated transport	ARCN1, ARF4, COL7A1, COPA, COPB1, DYNC1H1, DYNC1I2, DYNC1LI2, NSF, COPB2, DCTN2, YIF1A, TMED2, RAB35, COPZ1, COPG1, SEC31A, TMED3, ATL3, ARFGAP3, TRAPPC3, CNIH4, COPZ2, TMED9, ARFGAP1, TBC1D20	1.0235e-08	1.83203e-05
Gene Ontology	GO:0036498 IRE1-mediated unfolded protein response	HSPA5, PTPN1, SHC1, XBP1, YIF1A, SEC61B, PDIA5, KDELR3, SEC31A, SEC61G, SEC61A1, DNAJB11, WIPI1, ARFGAP1, MYDGF, SRPRB	1.14991e-08	2.0583e-05
Gene Ontology	GO:0098609 cell-cell adhesion	ARHGAP1, CAPZB, CNN2, CNN3, EIF4G2, ENO1, GOLGA3, HSPA5, HSPA8, PFN1, PKM, PTPN1, SLC3A2, FSCN1, TAGLN2, PPFIBP1, PDLIM1, BAG3, CKAP5, PLIN3, PAICS, SEPT9, MAPRE1, ERC1, TMEM2, EHD4, ASAP1, SH3GLB1, FAM129B, CHMP4B	2.97887e-06	0.00533
KEGG	hsa04145 Phagosome	ACTG1, ATP6V1A, ATP6V1B2, ATP6V0B, CALR, DYNC1H1, DYNC1I2, DYNC1LI2, HLA-A, HLA-DQA1, HLA-DRB4, ITGA5, ITGAV, ITGB1, ITGB5, LAMP1, LAMP2, TAP1, THBS2, TUBB2A, TUBA1A, TUBB3, SEC61B, SEC61G, SEC61A1, ATP6V1D, COLEC12, TUBB2B	2.78157e-09	3.59031e-06
KEGG	hsa04141 Protein processing in endoplasmic reticulum	BAX, CALR, DAD1, DDOST, HSPA5, HSPA8, STT3A, P4HB, RPN1, RRBP1, SSR2, HSP90B1, UBE2D3, UBE2E1, XBP1, HSPH1, SEC61B, CKAP4, SEC31A, SEC61G, EIF2AK1, ERLEC1, SEC61A1, UBE2J1, DNAJB11, SELENOS, DERL1	1.03691e-07	0.000133839
KEGG	hsa04512 ECM-receptor interaction	COL1A1, COL1A2, COL3A1, COL5A1, COL5A2, COL6A1, COL6A2, COL6A3, TNC, ITGA5, ITGAV, ITGB1, ITGB5, LAMA2, LAMC1, THBS2, ITGA10, ITGA11	5.88677e-07	0.000759832
KEGG	hsa04510 Focal adhesion	ACTG1, ACTN1, COL1A1, COL1A2, COL3A1, COL5A1, COL5A2, COL6A1, COL6A2, COL6A3, FLNC, TNC, ITGA5, ITGAV, ITGB1, ITGB5, LAMA2, LAMC1, PDGFRB, PIK3R2, PTEN, SHC1, THBS2, ITGA10, ITGA11, PARVA	1.55731e-05	0.0201
